# Supplementary material
Source: publisher figshare collection journal article supplement (https://acs.figshare.com/ndownloader/files/27951167)
Supplement: Supplementary file 1 [file 27951167]

## Supporting Information

### Mobile Media Promotes Orientation of 2D/3D Hybrid Lead Halide Perovskite for Efficient Solar Cells

Ning Zhou<sup>a</sup>, Yu Zhang<sup>a</sup>, Zijian Huang<sup>a</sup>, Zhenyu Guo<sup>a</sup>, Cheng Zhu<sup>b</sup>, Jingying He<sup>c</sup>, Qi Chen<sup>b</sup>, Wentao Sun<sup>c</sup>, Huanping Zhou<sup>\*a</sup>

- a. Beijing Key Laboratory for Theory and Technology of Advanced Battery Materials, Key Laboratory of Polymer Chemistry and Physics of Ministry of Education, BIC-ESAT, School of Materials Science and Engineering, Peking University, Beijing 100871, P. R. China
- b. School of Materials Science and Engineering, Beijing Institute of Technology, Beijing 100081, P. R. China
- c. Key Laboratory for the Physics and Chemistry of Nano devices, Department of Electronics, Peking University, Beijing 100871, P. R. China

E-mail: [happy\\_zhou@pku.edu.cn](mailto:happy_zhou@pku.edu.cn)

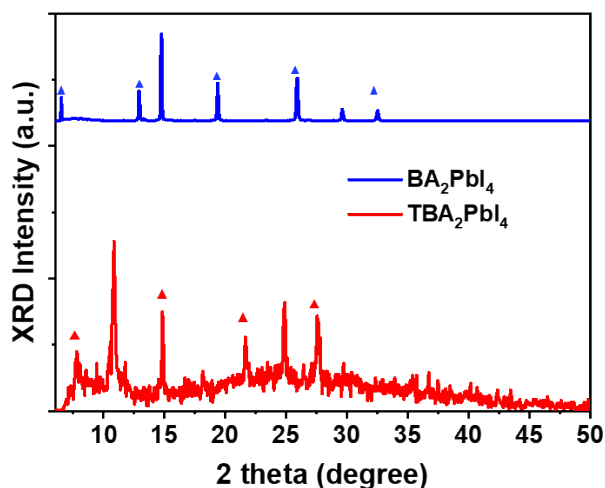

Figure S1. The XRD spectra of BA<sub>2</sub>PbI<sub>4</sub> and TBA<sub>2</sub>PbI<sub>4</sub>.

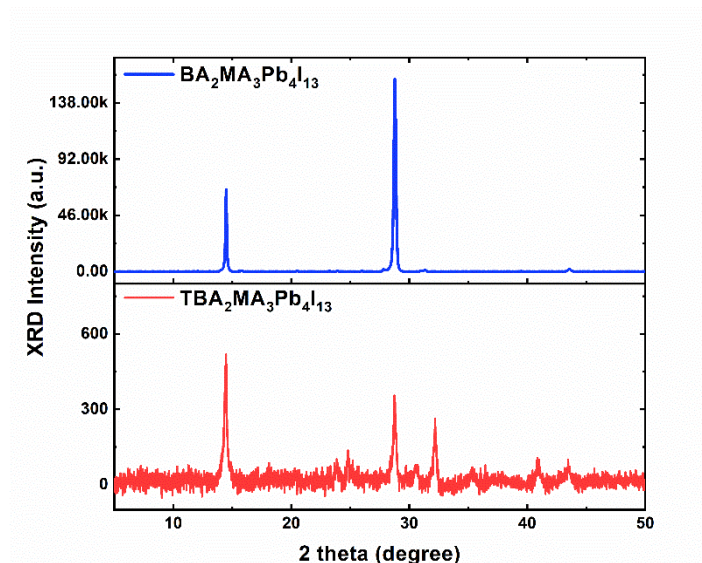

**Figure S2.** XRD patterns of  $\text{BA}_2\text{MA}_3\text{Pb}_4\text{I}_{13}$  and  $\text{TBA}_2\text{MA}_3\text{Pb}_4\text{I}_{13}$  films based on hot-casting method.

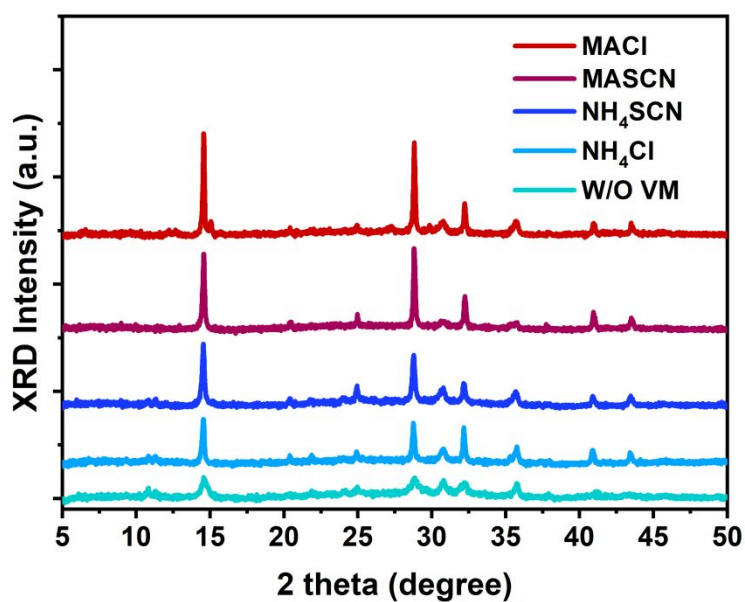

**Figure S3.** XRD patterns of the films without or with different volatile salts based on  $(\text{TBA})_2(\text{MA})_3\text{Pb}_4\text{I}_{13}$  perovskite films.

**Table S1.** The FWHM and integral peak area derived from the XRD results.

|                    | W/O VM | $\text{NH}_4\text{Cl}$ | $\text{NH}_4\text{SCN}$ | MASCN | MACl  |
|--------------------|--------|------------------------|-------------------------|-------|-------|
| FWHM of (111) /°   | 0.299  | 0.104                  | 0.091                   | 0.088 | 0.078 |
| Peak area of (111) | 725    | 2108                   | 2552                    | 6822  | 18234 |

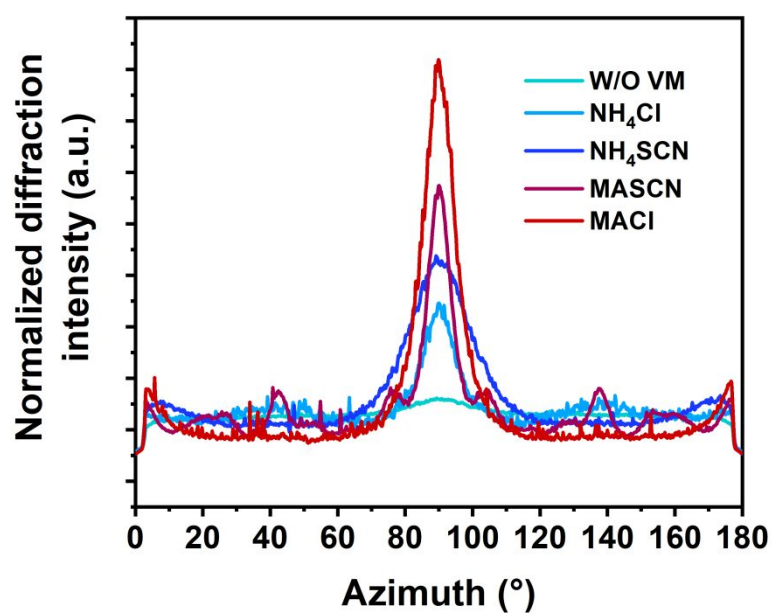

**Figure S4.** Integrated intensity plots azimuthally along the ring at  $q_{xy} \approx -1$  to  $1 \text{ \AA}^{-1}$ .

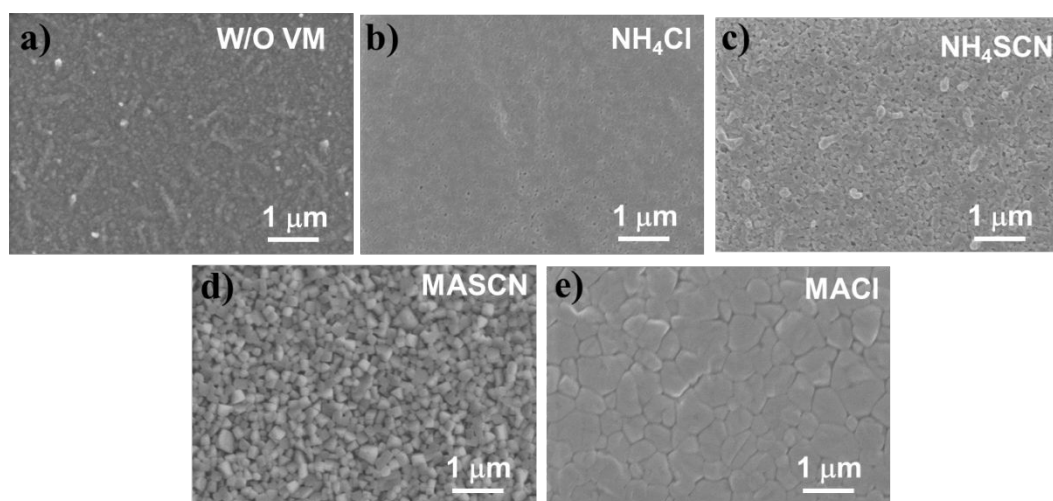

**Figure S5.** (a) SEM images of the 2D/3D hybrid perovskite films without volatile salts; (b)-(e) SEM images of the 2D/3D hybrid perovskite films with the assistance of  $\text{NH}_4\text{Cl}$ ,  $\text{NH}_4\text{SCN}$ ,  $\text{MASCN}$ ,  $\text{MACl}$ , respectively.

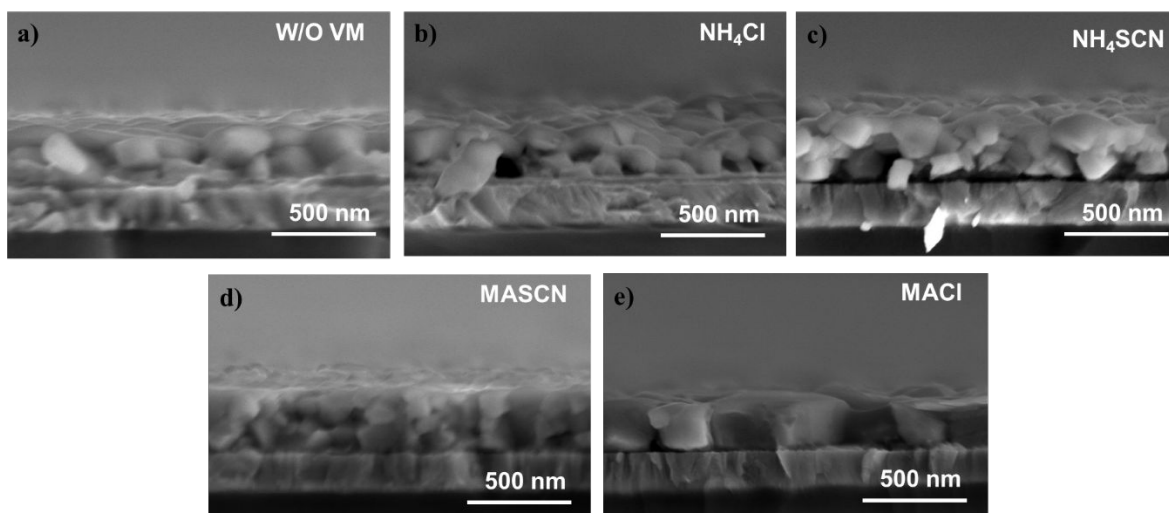

**Figure S6.** (a) The cross-sectional SEM images of the 2D/3D hybrid perovskite films without volatile salts; (b)-(e) SEM images of the 2D/3D hybrid perovskite films with the assistance of  $\text{NH}_4\text{Cl}$ ,  $\text{NH}_4\text{SCN}$ , MASCN, MACl, respectively.

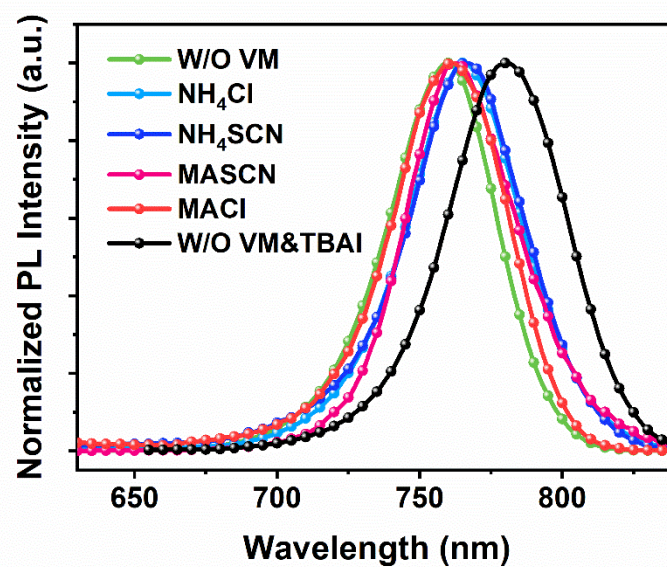

**Figure S7.** The steady-state PL spectra of the  $\text{TBA}_2\text{MA}_9\text{Pb}_{10}\text{I}_{31}$  perovskite films with different volatile salts.

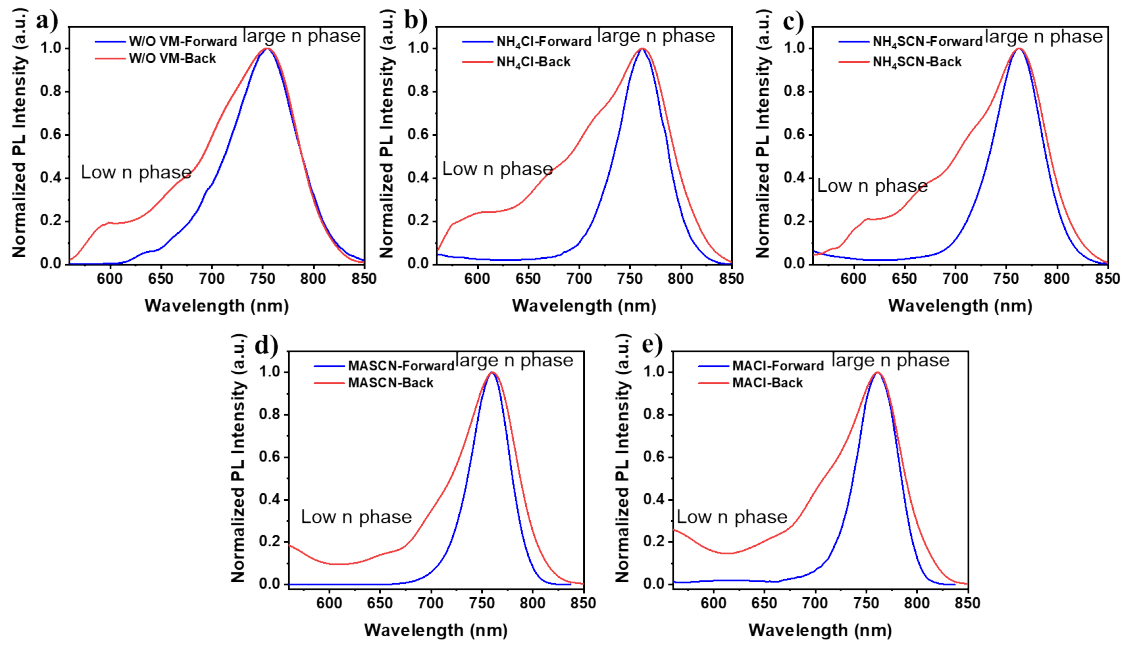

**Figure S8.** (a) The front and back PL of the 2D/3D hybrid perovskite films (ITO/perovskite) without volatile salts; (b)-(e) The front and back PL of the 2D/3D hybrid perovskite films with the assistance of  $\text{NH}_4\text{Cl}$ ,  $\text{NH}_4\text{SCN}$ ,  $\text{MASCN}$ ,  $\text{MACl}$ , respectively.

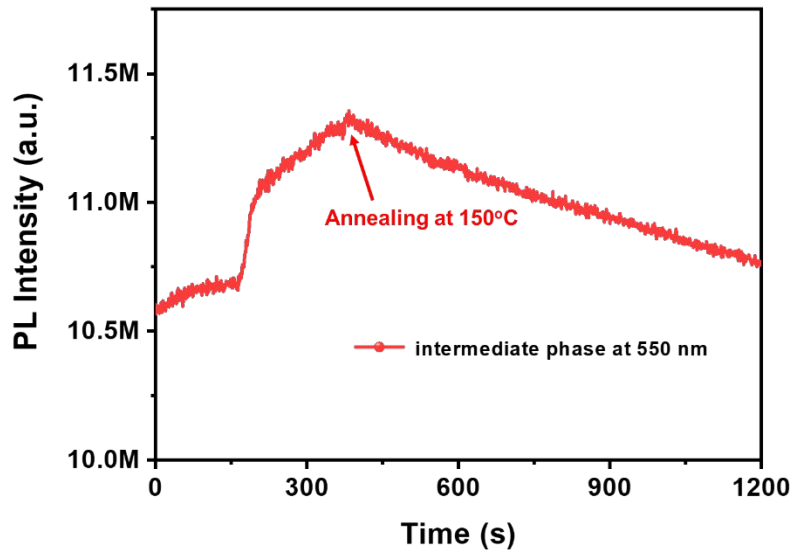

**Figure S9.** *In situ* PL measurement for  $\text{TBA}_2\text{MA}_3\text{Pb}_{10}\text{I}_{31}$  film formation process with  $\text{MACl}$  by detecting the emission peak at 550 nm.

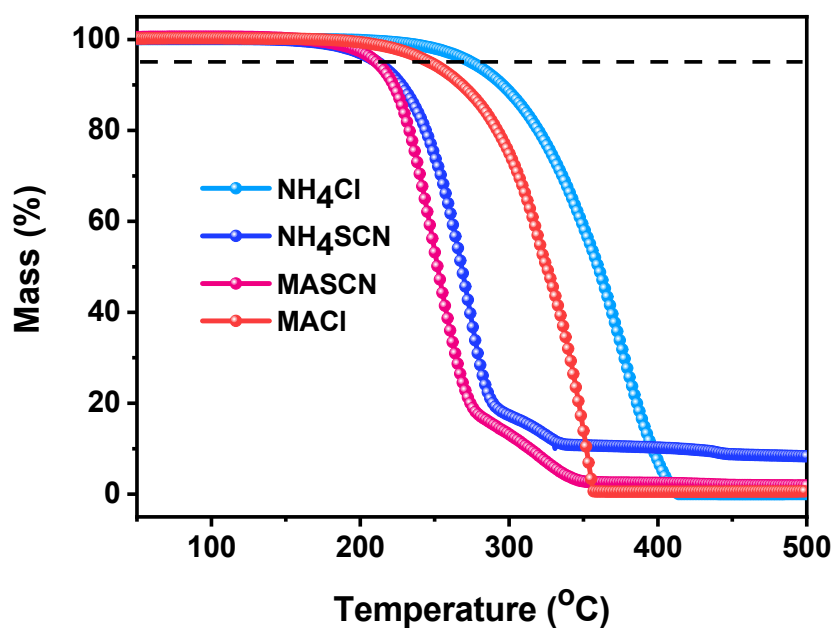

**Figure S10.** TGA curves for  $\text{NH}_4\text{Cl}$ ,  $\text{NH}_4\text{SCN}$ ,  $\text{MASCN}$ ,  $\text{MACl}$ , respectively in nitrogen atmosphere.

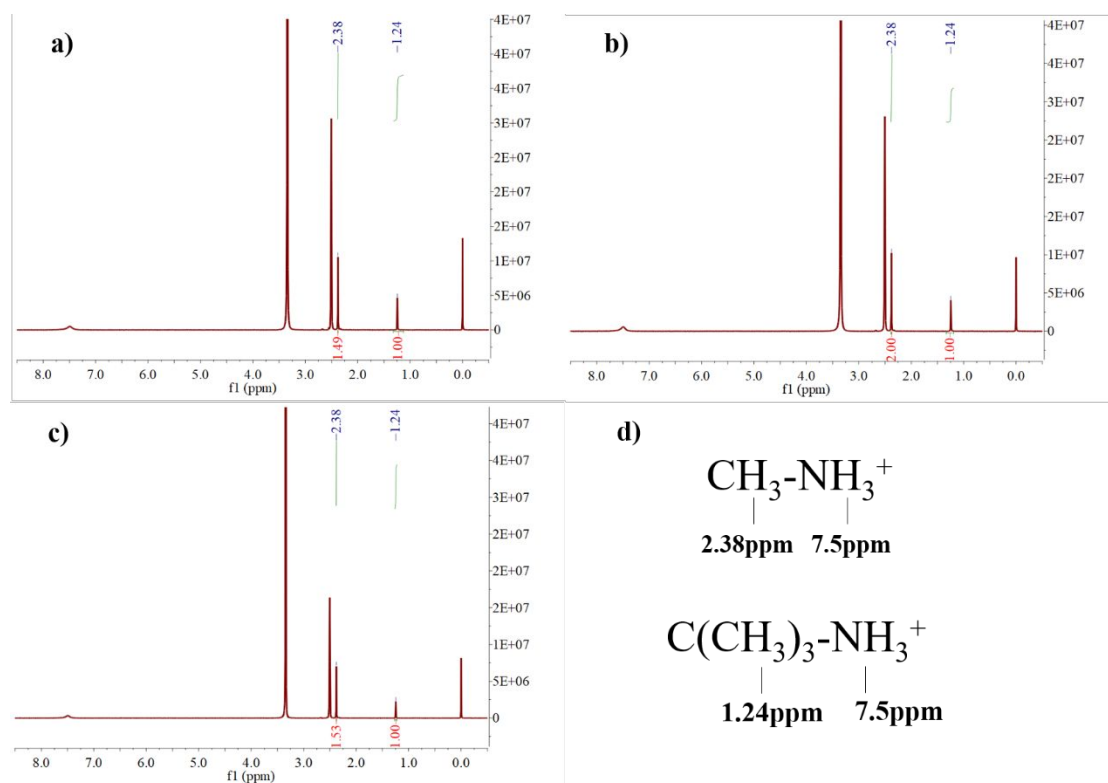

**Figure S11.** The NMR spectra of (a)  $\text{TBA}_2\text{MA}_9\text{Pb}_{10}\text{I}_{31}$  without volatile salt; (b)  $\text{TBA}_2\text{MA}_9\text{Pb}_{10}\text{I}_{31}$  with  $\text{MASCN}$ ; (c)  $\text{TBA}_2\text{MA}_9\text{Pb}_{10}\text{I}_{31}$  with  $\text{MACl}$ ; (d) The chemical shift of the H from the different organic cations. The samples were scraped from the formed films.



The chemical shift located at 0 ppm、~2.51 ppm、~3.32 ppm represented  $\text{Si}(\text{CH}_3)_4$ , dimethyl sulfoxide- $d_6$ ,  $\text{H}_2\text{O}$ , respectively. The chemical shift of H bonding with C in  $\text{CH}_3\text{NH}_3^+$  located at 2.38 ppm, and the chemical shift of H bonding with C in  $\text{C}(\text{CH}_3)_3\text{NH}_3^+$  located at 1.24 ppm, where the chemical shift of H bonding with N in both  $\text{CH}_3\text{NH}_3^+$  and  $\text{C}(\text{CH}_3)_3\text{NH}_3^+$  located at 7.5 ppm.

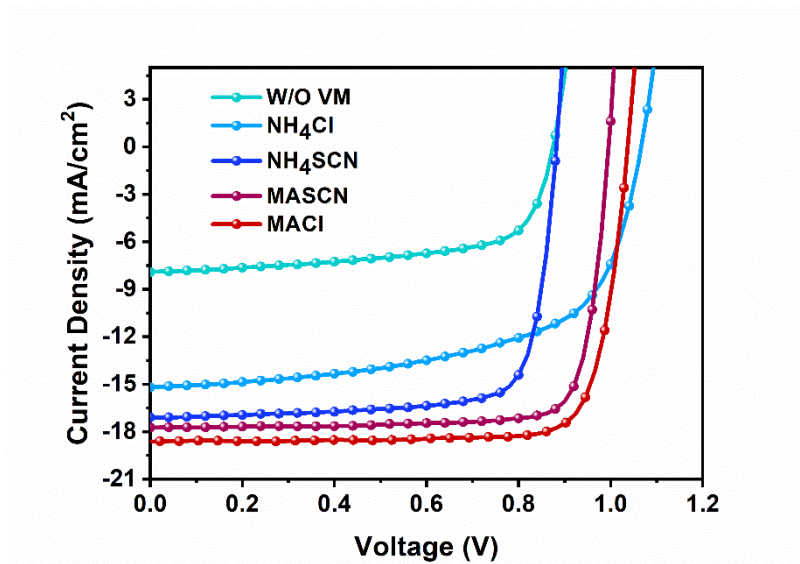

**Figure S12.** The J-V curves of  $\text{TBA}_2\text{MA}_9\text{Pb}_{10}\text{I}_{31}$  with or without volatile salts based perovskite solar cells by adopting invert device structure.

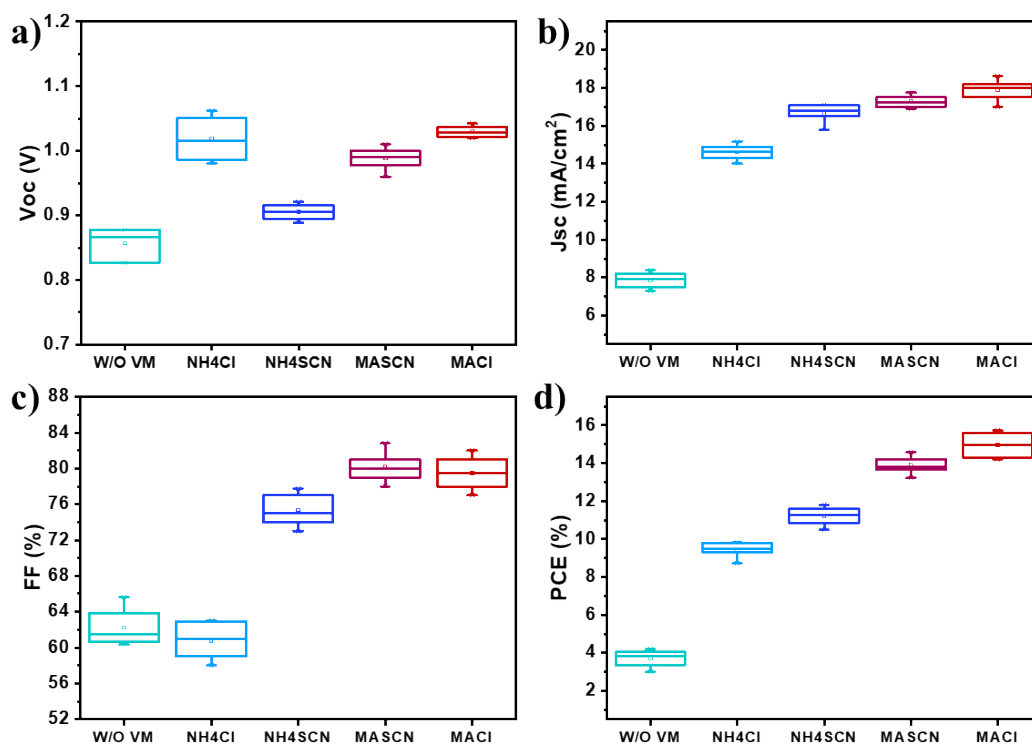

**Figure S13.** (a) Voc; (b) Jsc; (c) FF; (d) PCE statistic distribution of 2D/3D hybrid perovskite based solar cells without volatile salts and with the assistance of  $\text{NH}_4\text{Cl}$ ,  $\text{NH}_4\text{SCN}$ ,  $\text{MASCN}$ ,  $\text{MACl}$ , respectively.

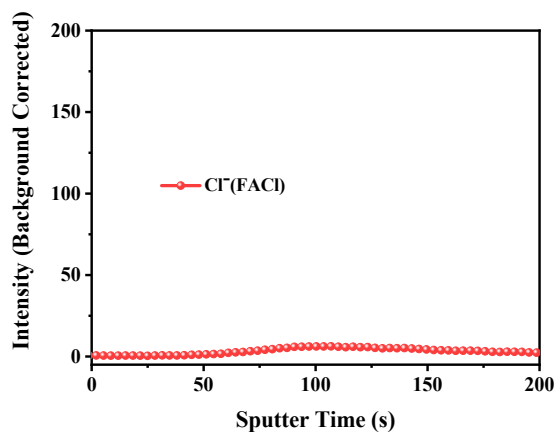

**Figure S14.** TOF-SIMS depth-profiles of film with FACL.

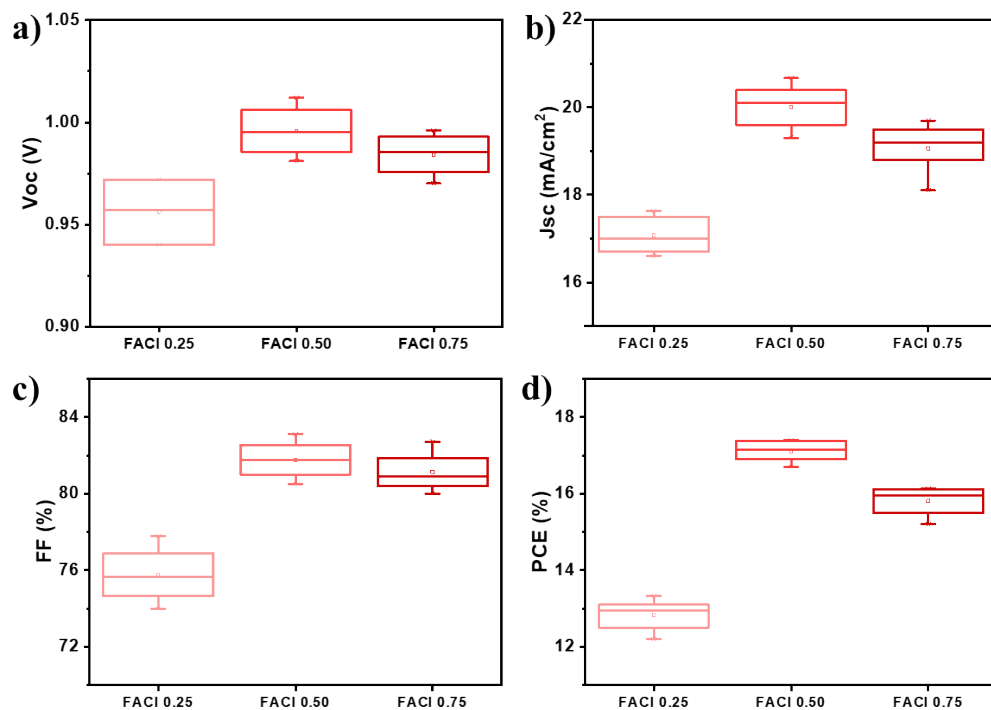

**Figure S15.** (a) Voc; (b) Jsc; (c) FF; (d) PCE statistic distribution of 2D/3D hybrid perovskite based solar cells with the assistance of FACL 0.25, FACL0.50, FACL 0.75, respectively.



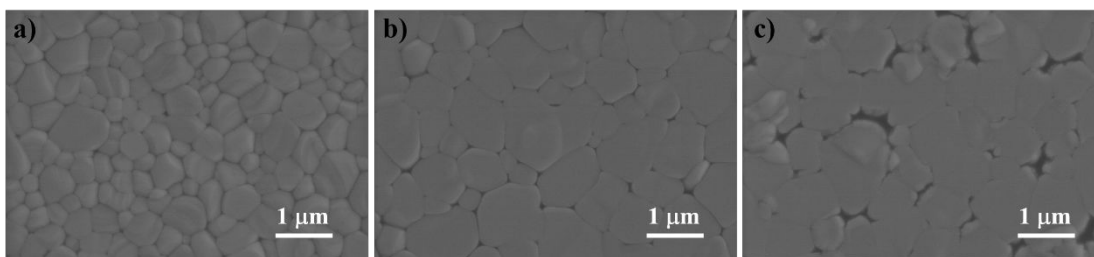

**Figure S16.** (a)-(c) SEM images of the 2D/3D hybrid perovskite films with the assistance of FACl0.25, FACl50, FACl0.75, respectively.

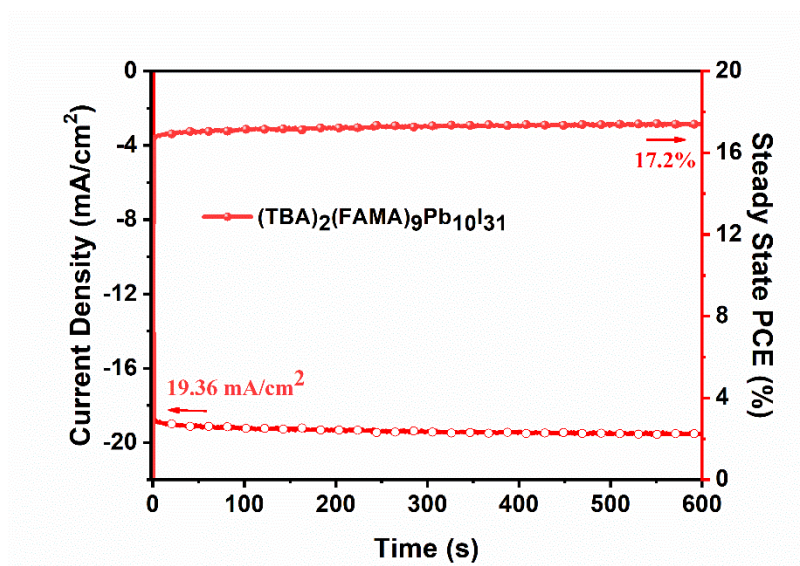

**Figure S17.** The steady-state PCE of the  $\text{TBA}_2\text{MA}_9\text{Pb}_{10}\text{I}_{31}$  (17.2% at a voltage of 0.89V) based perovskite solar cells.

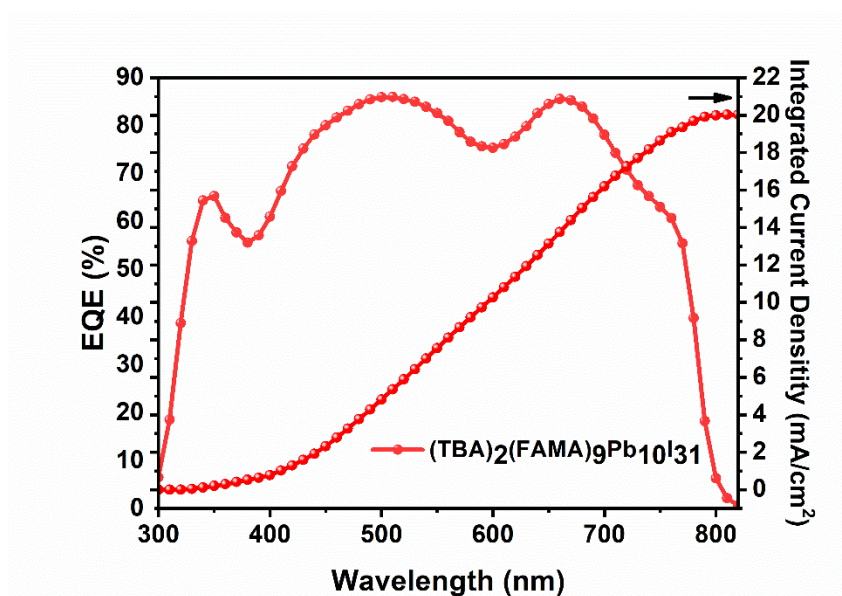

**Figure S18.** The EQE spectra of  $\text{TBA}_2(\text{FAMA})_9\text{Pb}_{10}\text{I}_{31}$  based perovskite solar cells.

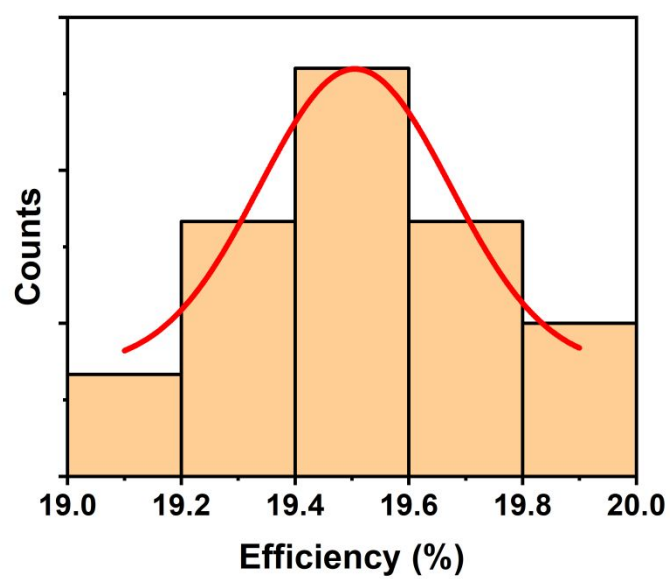

**Figure S19.** Histograms of PCE for TBA<sub>2</sub>MA<sub>19</sub>Pb<sub>20</sub>I<sub>61</sub> based solar cells, composed of 23 separate devices.

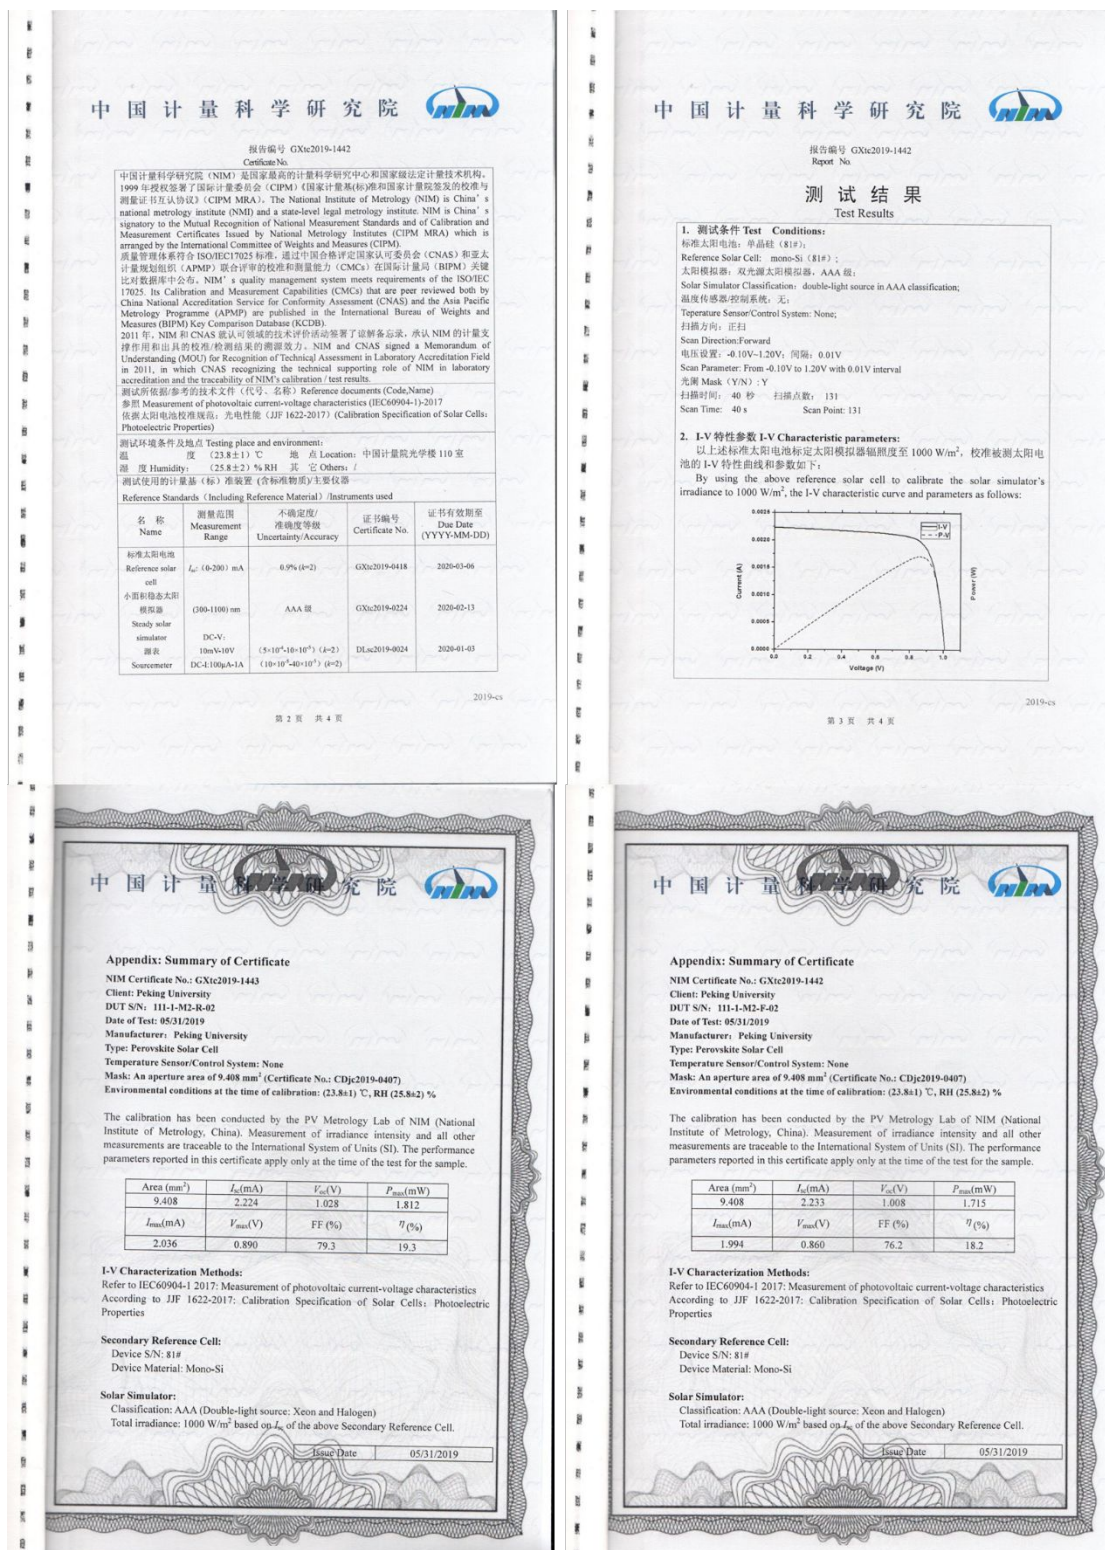

**Figure S20.** Certificated results by the National Institute of Metrology, China (NIM, China). The forward scan is performed from  $-0.1$  V to  $1.2$  V at  $33$  mV/s, with a PCE of  $18.2\%$  ( $V_{oc}=1.008$  V,  $I_{sc}=2.233$  mA,  $FF=76.2\%$ ). The reverse scan is performed from  $1.2$  V to  $-0.1$  V at  $33$  mV/s, with a PCE of  $19.3\%$  ( $V_{oc}=1.028$  V,  $I_{sc}=2.224$  mA,  $FF=79.3\%$ ). The device has an active area of  $0.09408$  cm<sup>2</sup>.

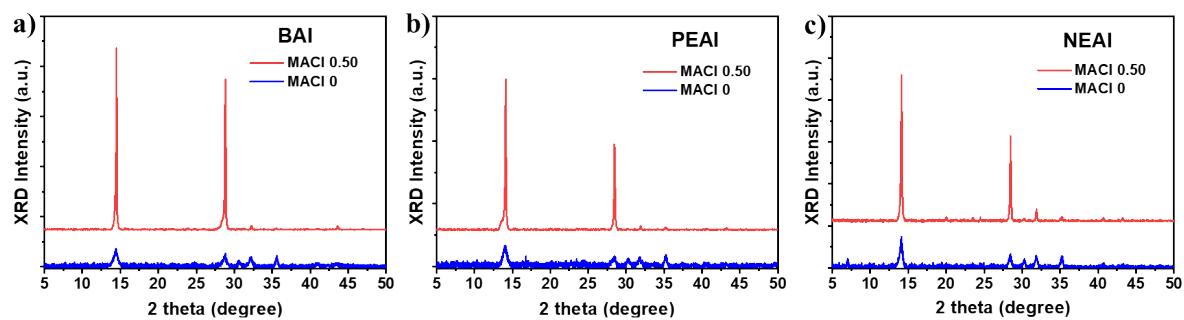

**Figure S21.** (a) XRD patterns of the  $(\text{BA})_2(\text{MA})_9\text{Pb}_{10}\text{I}_{31}$  perovskite films without and with MACl. (b)  $(\text{PEA})_2(\text{MA})_9\text{Pb}_{10}\text{I}_{31}$  without and with MACl. (c)  $(\text{NEA})_2(\text{MA})_9\text{Pb}_{10}\text{I}_{31}$  without and with MACl.
